# Supplementary material
Source: HighWire-hosted journal article supplement (https://www.cmajopen.ca/highwire/filestream/90820/field_highwire_adjunct_files/1/open-2022-0245-original-submission.pdf)
Supplement: open-2022-0245-original-submission.pdf [file open-2022-0245-original-submission.pdf]

## The success of publicly funded rotavirus vaccine programs for preventing hospitalized rotavirus disease in Canadian children: an observational study

Nicole Le Saux MD, Children's Hospital of Eastern Ontario (CHEO), Department of pediatrics, University of Ottawa, Ottawa, ON

Julie Bettinger PhD, Vaccine Evaluation Center, BC Children's Hospital Research Institute, University of British Columbia, Vancouver, BC

Hennady Shulha PhD, Vaccine Evaluation Center, BC Children's Hospital Research Institute, Dept of Pediatrics, , University of British Columbia, Vancouver, BC

Manish Sadarangani BM BCh DPhil, Vaccine Evaluation Center, BC Children's Hospital Research Institute, Dept of Pediatrics, University of British Columbia, Vancouver, BC

Doug Coyle PhD, School of Epidemiology and Public Health, University of Ottawa, Ottawa, ON

Timothy Booth PhD, Viral Diseases Division, National Microbiology Laboratory, Public Health Agency of Canada, Winnipeg, MB

Taj Jadavji MD Alberta Children's Hospital, Department of Pediatrics, University of Calgary, AB

Scott Halperin MD, Dalhousie University and Canadian Center for Vaccinology, IWK Health Centre, Halifax, NS

For members of Immunization Monitoring Program ACTIVE:

Karina A. Top MD, Dalhousie University and Canadian Center for Vaccinology, IWK Health Centre, Halifax, NS

Roseline Thibeault MD, Centre Mère-Enfant Soleil de Québec (Pavillon CHUL), Université Laval, Québec City, QC

Shaun K. Morris MD, Hospital for Sick Children, Dalla Lana School of Public Health, University of Toronto

Kescha Kazmi MD, Hospital for Sick Children, Temerty Faculty of Medicine, University of Toronto

J. Bullard MD, Winnipeg Winnipeg Children's Hospital Health Sciences Centre, University of Manitoba

Laura Sauvé MD, BC Children's Hospital, University of British Columbia, Vancouver, BC.

C. Constantinescu MD, Alberta Children's Hospital, Pediatric Infectious Disease, University of Calgary, Calgary, AB

Jesse Papenburg MD, Montreal Children's Hospital, McGill University, Montréal, QC MD

Marc Lebel MD, CHU-Sainte-Justine, Montréal, Université de Montréal, QC

Fatima Kakkar MD, CHU-Sainte-Justine, Centre de recherche du CHU Sainte-Justine, Montréal, QC

Cheryl Foo MD, Janeway Children's Health and Rehabilitation Center, Memorial University, St. John's, NL

Catherine Burton MD, Stollery Children's Hospital and University of Alberta, Edmonton, AB

Rupeena Purewal, Jim Pattison Children's Hospital, University of Saskatchewan, Saskatoon, SK

Rupesh Chawla, Jim Pattison Children's Hospital, University of Saskatchewan, Saskatoon, SK

Corresponding Author: [lesaux@cheo.on.ca](mailto:lesaux@cheo.on.ca)

### Funding Sources:

The Canadian Immunization Monitoring Program Active (IMPACT) network of paediatric investigators and managed by the Canadian Paediatric Society (CPS). CPS receives ongoing funding from the Public Health Agency of Canada's (PHAC's) Centre for Immunization and Respiratory Infectious Diseases (CIRID) for IMPACT), a national surveillance initiative. Funding for this specific surveillance project was provided by PHAC, the Canadian Paediatric Society, and through unrestricted grants from GlaxoSmithKline Pharmaceuticals Limited and Merck Canada Incorporated

## The success of publicly funded rotavirus vaccine programs for preventing hospitalized rotavirus disease in Canadian children: an observational study

Rotavirus is a major cause of pediatric gastroenteritis worldwide with severe manifestations in up to 1%-2% of infected infants. Economic modeling in Canada showed that publicly funded rotavirus vaccination programs would be cost effective if societal costs were considered. (1) Two live attenuated vaccines, monovalent Rotarix<sup>®</sup> (Rot-1; GlaxoSmithKline Biologicals, Rixensart, Belgium) and pentavalent RotaTeq<sup>®</sup> (Rot-5; Merck & Co., West Point, PA, USA) are available for infants at either 2 and 4 months of age (Rot-1) or 2, 4 and 6 months of age (Rot-5).

In the United States (US) and Australia, studies have shown rotavirus vaccine effectiveness ranges from 78% to 89% and annual rotavirus hospitalization rates decreased by 75% to 80% after the introduction of rotavirus vaccine. (2–4) In England there was a 26% decline in all cause gastroenteritis hospitalizations within one year of program implementation. (5) A prior Canadian study using national discharge rates from 2007 to 2017 determined that for children under 2 years, the rotavirus gastroenteritis hospitalizations had decreased by more than 80% between the pre and post vaccine periods.(6)

The aim of this study was to determine the effects of publicly funded rotavirus immunization programs on the epidemiology of community acquired (CA) and hospital associated (HA) rotavirus disease hospitalizations within the Canadian Immunization Monitoring Program, ACTive (IMPACT), a surveillance network of tertiary care pediatric hospitals (<https://cps.ca/en/impact>).

### Methods

#### Study Locations

Active, surveillance for hospital admissions and hospital acquired rotavirus infections was conducted by the 12 pediatric IMPACT hospitals since 2005. In Canada, Rot-1 vaccine (Rotarix<sup>™</sup>) was used primarily until mid-2017 after which Rot-5 (RotaTeq<sup>™</sup>) was used through 2020. The month and year of initiation of publicly funded immunization programs in Canada including provinces and territories without IMPACT sites is shown in Table 1.

#### Study Subjects

Children 0 to 16 years who had laboratory confirmed rotavirus infections and were hospitalized at the IMPACT hospitals either on an inpatient ward or equivalent (such as a short stay or observation unit) between January 1, 2005 and December 31, 2020 were included. Trained nurse monitors prospectively identified and listed cases from admission lists and microbiology reports on a regular basis. ICD-10 discharge code searches were also conducted annually to identify any missed cases of diarrhea or viral gastroenteritis using the following ICD10 codes: A08 (viral and other intestinal infections), A09 (diarrhea and gastroenteritis of infectious origin), K52.9 (noninfectious gastroenteritis), R11 (nausea and vomiting), and R15 (fecal incontinence) and if found, were screened for rotavirus positivity. The chart abstraction occurred after discharge.

All centers used the same case finding strategies, case definition, and case report form. Identification of rotavirus gastroenteritis was detected using either enzyme linked immunoassay [ELISA] or molecular

1  
2  
3  
4  
5  
6  
7  
8  
9  
10  
11  
12  
13  
14  
15  
16  
17  
18  
19  
20  
21  
22  
23  
24  
25  
26  
27  
28  
29  
30  
31  
32  
33  
34  
35  
36  
37  
38  
39  
40  
41  
42  
43  
44  
45  
46  
47  
48  
49  
50  
51  
52  
53  
54  
55  
56  
57  
58  
59  
60

diagnostics (polymerase chain reaction) on stool specimens. Individual hospital census data (number of hospital admissions and inpatient hospital days) is reported yearly to IMPACT.

Cases with laboratory confirmation <72 hours after hospital admission were defined as community acquired cases (CA). Rotavirus identified from patients  $\geq 72$  hours after admission or readmitted with rotavirus  $\leq 48$  hours after the initial discharge were defined as hospital acquired (HA). Cases were included if they had acute gastrointestinal symptoms (diarrhea/vomiting). Cases admitted for unrelated reasons or no acute gastrointestinal symptoms (i.e., incidental cases) were excluded.

The following information was retrieved from review of the medical record: demographic data, pre-existing co-morbid or immune compromising conditions (using pre-defined lists), clinical features (including presence of dehydration, electrolyte abnormalities, seizures), length of stay, number and type of rotavirus vaccine received, and outcome. Prematurity was defined as a child born  $\leq 36$  weeks gestation who was still in the first year of life. Children were classified as generally healthy or having a known underlying/immunocompromising condition at the time of admission or during the admission. The determination of dehydration was based on documentation in admission notes. Data for clinical presentations were available from 2008 onwards and was captured only for cases with CA disease.

A vaccine failure was defined as children who had received 2 doses of Rot-1 or 3 doses of Rot-5 vaccine at least 2 weeks prior to admission.

Research Ethics Board or hospital approval was obtained for all sites.

### Statistical Analysis

The overall, age-specific and site-specific CA rotavirus hospitalizations rates were reported per 10,000 hospital admissions, based on yearly hospital census data. The rates of HA rotavirus infections were calculated per 1,000 inpatient days. This was stratified by age groups (0-11 months, 12-23 months, 24-59 months, 5-9 years, and 10-16 years).

For each province, the year a rotavirus vaccine program was introduced was designated as year 0 of the program, with the years prior to province specific vaccine programs being designated -15 to -1 and years following introduction designated as +1 to +9. All calculations were done with the year of vaccination program start as "year 0" unless the program started in November or later where the next calendar year was designated as "year 0". Cases occurring in year "0" at each site were not included in the pre and post vaccine periods as the year "0" was designated a transition year.

Analysis for indirect effect of the vaccine included only individuals within age groups who were previously or currently ineligible for vaccine based on age.(7) Average admission rate in these eligible cohorts was calculated separately for pre and post vaccine periods.

Descriptive statistic comparisons were obtained using Wilcoxon rank-sum tests for continuous variables and chi-square tests for categorical variables, stratified by pre and post vaccine eras. Adjustment for multiple comparisons was not done. Binomial confidence intervals were calculated for proportions.

Analyses were conducted in R (V.4.1.1; The R Project for Statistical Computing, Vienna, Austria) and data cleaning was done in SAS (V.9.4, SAS Institute, Cary, North Carolina, USA).

## Results

A total of 5,691 rotavirus hospitalizations were identified at the 12 sites from January 1, 2005, to December 31, 2020 of which 4,323 (76%) were CA and 1,368 (24%) were HA. Overall, the median age for CA cases was 1.5 years (interquartile range (IQR) 0.8 – 2.9 years) whereas the median age for HA cases was 0.8 years (IQR 0.3 to 2 years). The age breakdown was 2,148 (38%) 0-11 months, 1,523 (27%) 12-23 months, 1,305 (23%) 24 to 59 months, 479 (8%), 5 to 9 years, and 236 (4%) 10 to 16 years. Of the entire cohort of 5,691 children, 2,621 (46%) had underlying co-morbidities and among this group, 790 (14%) were immunosuppressed.

### Comparisons Pre and Post vaccine periods

The overall average rate of hospitalization admissions due to CA rotavirus decreased from 60.3 [95% CI 52.0-68.6] per 10,000 hospital admissions in the pre vaccine period to 10.98 [95% CI 6.2-15.82] per 10,000 resulting in a rate reduction of 82% [95% CI 74.4%-89.8%] (Figure 1a). The prevalence of HA rotavirus decreased by 85% [95% CI 27.6%-99.7%]; 0.35 per 1000 patient days during the pre vaccine period to 0.05 per 1000 patient days in the post vaccine period (Figure 1b). Differences in CA and HA over the 2 time periods were statistically significant ( $p$ -values  $<0.001$ ).

The demographics of both CA and HA rotavirus cases by pre and postvaccine periods is seen in Table 2. Among CA cases in the pre vaccine period, 2277/3331 (68.4% [95% CI 66.8-69.0]) were generally healthy whereas in the post vaccine period, 372/656 (53.4% [95% CI 52.9-60.4]) were generally healthy. Among HA cases, in the pre vaccine period, 190/1109 (17.1% [95% CI 15.0-19.5]) were healthy compared to the post vaccine period where 9/162 (5.5% [95% CI 3.0-10.2]) were healthy.

The major presenting signs and symptoms for patients with CA disease in the pre and postvaccine periods are seen in Table 3.

The yearly decrease in rates of CA rotavirus hospitalization and HA rotavirus pre and post vaccine periods by age is illustrated in Figure 2a and 2b showing decreasing trends in hospitalizations in various age groups. The average CA rotavirus hospitalization rates and HA rotavirus rates by age cohorts in pre vaccine and post vaccine periods is seen Table 4. There were decreases in both CA and HA associated hospitalizations for those who were not in the vaccine eligible cohorts, and this was seen for all age groups.

In the post vaccine period, 61 (7.4%) of 818 total cases (53 [86.9%] had CA and 8 [13.1%] had HA disease) had received the recommended number of doses of vaccine at least 2 weeks prior to admission and were designated vaccine failures. The mean age for patients with vaccine failures was 1.9 (SD 1.5) years, median 1.7 years (IQR 0.9-2.4 years). Of these, 27 (44%) of 61, had underlying co-morbidities of which 9 (33.3%) had immunocompromising conditions.

During the entire surveillance period, a total of 40 (0.7%) deaths were reported at the same admission as the rotavirus hospitalizations. Of the 40 deaths, 39 (97.5%) had underlying diseases or prematurity (one was unknown) with 26 (65%) occurring in the time period before vaccine programs (-1 to -15 years), 4 (10%) the year a program was initiated (year 0) and 10 (25%) in the post vaccine program periods (+1 to +9 years). In these cases, it is unknown if the rotavirus infection contributed to the deaths. Of the 40 cases, 13 (32.5%) were CA and 27 (67.5%) were HA. Of the 13 who had CA infections, 3 (23%) were 0-11 months, 2 (15.4%) 12 to 23 months, 5 (38.5%) 24-59 months, 1 (7.7%), 5 to 9 years and

1  
2  
3 2 (15.4%), 10-16 years of age. Of the 27 who had HA rotavirus infections, 13 (48.1%) were 0- 11 months,  
4 2 (7.4%), 12-23 months, 3 (11.1%),24-59, 6 (22.2%), 5-9 years and 3 (11.1%) 5 -16 years.

6 Of the 10 deaths which occurred in the post vaccine program periods, 6 were CA (3 cases 0-23 months, 3  
7 cases, 24-59 months) and 4 were HA infections (all 0-11 months). Of these, 7 had no RV vaccines, 2 had  
8 had 1 dose and one had received the complete series.

## 10 Discussion

11  
12 This 15-year, real-world, active surveillance for rotavirus hospitalization in children demonstrates a  
13 significant and sustained decrease in rotavirus hospitalizations for both CA and HA disease in Canadian  
14 IMPACT study sites since oral RV vaccine was introduced into provincial vaccine programs. The average  
15 rate reduction between pre and post vaccine program implementation was 82% for CA rotavirus  
16 admissions and 85% for HA rotavirus infections.

18  
19 These data add to the world literature on the success of rotavirus immunization programs in decreasing  
20 morbidity in high income countries where prior reports from Finland, England, Austria, United States,  
21 New Zealand and Australia have shown decreases of 75%-92% in rotavirus hospitalizations mainly in the  
22 first 5-6 years of program implementation. (8–12) Data from a surveillance study in the United States  
23 (US) conducted at 6-7 years post vaccine program implementation noted an overall vaccine efficacy (VE)  
24 against severe disease of 69% (95% CI 43-84) suggesting reasonable longer term vaccine efficacy. (13) In  
25 Leipzig Germany, a 10-year follow-up after introduction of RV1 vaccine program the incidence of  
26 hospitalization dropped by 85% despite an average vaccinated portion of children of 47.6%. (14) Our  
27 data also show that the reduction in both CA and HA disease is sustained at 9 years at sites that had  
28 programs as of 2011. In contrast, a report from Poland where vaccine is not being deployed as a publicly  
29 funded program leading to low vaccine coverage of 25%, there was no significant impact on  
30 hospitalizations due to rotavirus. (15)

32  
33  
34 Studies reporting the prevalence of HA diseases, including a Canadian study at IMPACT sites prior to  
35 availability of RV vaccines, had shown that between 19% to 27% of hospitalized rotavirus cases were HA  
36 and represented a significant burden on hospital costs mainly through increases in length of stay.  
37 (16,17) Our study and others showed a significant decline in disease in all HA rates especially in the 0 to  
38 11 month age group very rapidly after program implementation suggesting as well, that CA rotavirus  
39 admissions are a likely a major source of transmission to hospitalized patients. (18,19)

41  
42 Given that RV vaccine is given only to infants (with the last dose given prior to 8 months of age) indirect  
43 effects on disease incidence on non-vaccine eligible cohorts can be calculated. (7) Our data show  
44 parallel decreases in both CA and HA disease in older age groups. In a German cohort, the herd  
45 protection was estimated to be 38%. (19) A study from the US three years after RV vaccine introduction  
46 in children <3 years of age also noted substantial indirect protection in the cohort 12-23 months.(20)  
47 Other studies have noted the indirect VE as up to 82% four years after vaccine introduction.(21) In  
48 Australia and the US, including a study 7 years after the RV programs started, rotavirus hospitalization  
49 decreased in all age groups, including adult age groups supporting a substantial herd protection. ((22–  
50 25) However, data from Finland 5-6 years post vaccine programs have indicated that rotavirus cases  
51 continue to occur in older children and in the elderly. (26)

1  
2  
3 In a meta-analysis of global vaccine efficacy, a very small proportion (5%) of cases had received a  
4 complete vaccine series at least 2 weeks prior to hospitalization with vaccine efficacy estimated at over  
5 90% in settings with low mortality. (27) The vaccine failure rate in this cohort was slightly higher at 7.4%.  
6 The cause of vaccine failure may include vaccine cold chain issues, host specific blunted immune  
7 responses due to underlying illnesses or emergence of genotypes that escape immunity. (28) Genotype  
8 analysis of these strains is ongoing.  
9  
10

11 The major strength of our study is the active, standardized surveillance at the same sites over the 15-  
12 year observation period. This consistency provides accurate estimates of hospital admissions for both  
13 CA and HA rotavirus disease. The prolonged observation period accounts for the natural variation in  
14 disease incidence and underscores the longer-term benefits of rotavirus vaccines in preventing both CA  
15 and HA disease.  
16  
17

18 Limitations include less representation from sites that do not have IMPACT surveillance programs either  
19 within the province or in provinces or territories that are not included in IMPACT network. As rotavirus  
20 cases could have been admitted to regional or community hospitals not in the IMPACT network, the  
21 effect of vaccine against these cases could have been different from those of IMPACT hospitals which  
22 admit patients requiring secondary, and tertiary care. The network, however, accounts for up to 90% of  
23 pediatric tertiary care hospital beds in Canada. It is possible that patients were admitted to hospital with  
24 acute gastroenteritis or in hospital with new diarrheal illnesses and did not have samples sent for  
25 laboratory analysis, underestimating the true burden in both pre and post vaccine periods. Rotavirus  
26 infections from children recently admitted to other hospitals could have been HA acquired rather than  
27 CA cases, thereby underestimating HA cases or overestimating CA cases.  
28  
29

30 In conclusion, the publicly funded RV immunization programs in Canada have been associated with an  
31 80% decrease in hospitalizations for rotavirus infection in children 0-16 years over the past 9 years at  
32 IMPACT sites located in 8 provinces. HA rotavirus disease has also been drastically reduced leading to a  
33 decrease in hospital burden and morbidity for children already hospitalized.  
34  
35  
36  
37  
38  
39  
40  
41  
42  
43  
44  
45  
46  
47  
48  
49  
50  
51  
52  
53  
54  
55  
56  
57  
58  
59  
60



1. Coyle D, Coyle K, Bettinger JA, Halperin SA, Vaudry W, Scheifele DW, et al. Cost effectiveness of infant vaccination for rotavirus in Canada. *The Canadian journal of infectious diseases & medical microbiology* 2012;23(2):71–7.
2. Cortes JE, Curns AT, Tate JE, Cortese MM, Patel MM, Zhou F, et al. Rotavirus Vaccine and Health Care Utilization for Diarrhea in U.S. Children. *New England Journal of Medicine*. 2011;365(12):1108–17.
3. Fathima P, Jones MA, Moore HC, Blyth CC, Gibbs RA, Snelling TL. Impact of Rotavirus Vaccines on Gastroenteritis Hospitalizations in Western Australia: A Time-series Analysis. *J Epidemiol*. 2021;31(8):480–6.
4. Payne DC, Englund JA, Weinberg GA, Halasa NB, Boom JA, Staat MA, et al. Association of Rotavirus Vaccination With Inpatient and Emergency Department Visits Among Children Seeking Care for Acute Gastroenteritis, 2010–2016. *JAMA Netw Open*. 2019 Sep 4;2(9):e1912242–e1912242.
5. Atchison CJ, Stowe J, Andrews N, Collins S, Allen DJ, Nawaz S, et al. Rapid declines in age group-specific rotavirus infection and acute gastroenteritis among vaccinated and unvaccinated individuals within 1 year of rotavirus vaccine introduction in England and Wales. *Journal of Infectious Diseases*. 2016;213(2):243–9.
6. Muchaal PK, Hurst M, Desai S. The impact of publicly funded rotavirus immunization programs on Canadian children. *Canadian Communicable Diseases Report* . 2021;47(2):97–104.
7. Wierzba TF. Implications and measurement of herd protection (indirect effects) for enteric vaccine development. *Vaccine*. 2019 Aug 7;37(34):4775–7.
8. Hemming-Harlow M, Markkula J, Huhti L, Salminen M, Vesikari T. Decrease of Rotavirus Gastroenteritis to a Low Level Without Resurgence for Five Years After Universal RotaTeq Vaccination in Finland. *Pediatr Infect Dis J*. 2016;35(12):1304–8.
9. Tate JE, Cortese MM, Payne DC, Curns AT, Yen C, Esposito DH, et al. Uptake, impact, and effectiveness of rotavirus vaccination in the United States: review of the first 3 years of postlicensure data. *Pediatr Infect Dis J*. 2011;30:S56–60.
10. Dey A, Wang H, Menzies R, Macartney K. Changes in hospitalisations for acute gastroenteritis in Australia after the national rotavirus vaccination program. *Medical Journal of Australia*. 2012;197(8):453–7.
11. McIlhone KA, Best EJ, Petousis-Harris H, Howe AS. Impact of rotavirus vaccine on paediatric rotavirus hospitalisation and intussusception in New Zealand: A retrospective cohort study. *Vaccine*. 2020 Feb 11;38(7):1730–9.
12. Paulke-Korinek M, Rendi-Wagner P, Kundi M, Kronik R, Kollaritsch H. Universal mass vaccination against rotavirus gastroenteritis: Impact on hospitalization rates in Austrian children. *Pediatric Infectious Disease Journal*. 2010;29(4):319–23.

- 1  
2  
3 13. Payne DC, Selvarangan R, Azimi PH, Boom JA, Englund JA, Staat MA, et al. Long-term Consistency  
4 in Rotavirus Vaccine Protection: RV5 and RV1 Vaccine Effectiveness in US Children, 2012–2013.  
5 *Clinical Infectious Diseases*. 2015 Dec 15;61(12):1792–9.  
6
- 7 14. Pietsch C, Liebert UG. Rotavirus vaccine effectiveness in preventing hospitalizations due to  
8 gastroenteritis: a descriptive epidemiological study from Germany. *Clinical Microbiology and*  
9 *Infection*. 2019 Jan 1;25(1):102–6.  
10
- 11 15. Toczyłowski K, Jackowska K, Lewandowski D, Kuryłonek S, Waszkiewicz-Stojda M, Sulik A.  
12 Rotavirus gastroenteritis in children hospitalized in northeastern Poland in 2006–2020: Severity,  
13 seasonal trends, and impact of immunization. *International Journal of Infectious Diseases*. 2021  
14 Jul 1;108:550–6.  
15
- 16 16. Le Saux N, Bettinger J, Halperin S, Vaudry W, Scheifele D. Hospital acquired rotavirus infections:  
17 burden in Canadian paediatric hospitals. *J Infect Prev*. 2011 Apr 13;12(4):159–62.  
18
- 19 17. Gleizes O, Desselberger U, Tatochenko V, Rodrigo C, Salman N, Mezner Z, et al. Nosocomial  
20 rotavirus infection in European countries: A review of the epidemiology, severity and economic  
21 burden of hospital-acquired rotavirus disease. *Pediatric Infectious Disease Journal*. 2006;25(1  
22 SUPPL.).  
23
- 24 18. Cunliffe NA, Booth JA, Elliot C, Lowe SJ, Sopwith W, Kitchin N, et al. Healthcare-associated Viral  
25 Gastroenteritis among Children in a Large Pediatric Hospital, United Kingdom. *Emerg Infect Dis*.  
26 2010 Jan;16(1):55.  
27
- 28 19. Anderson EJ, Rupp A, Shulman ST, Wang D, Zheng X, Noskin GA. Impact of Rotavirus Vaccination  
29 on Hospital-Acquired Rotavirus Gastroenteritis in Children. *Pediatrics*. 2011 Feb 1;127(2):e264–  
30 70.  
31
- 32 20. Payne DC, Staat MA, Edwards KM, Szilagyi PG, Weinberg GA, Hall CB, et al. Direct and indirect  
33 effects of rotavirus vaccination upon childhood hospitalizations in 3 US counties, 2006–2009.  
34 *Clinical Infectious Diseases*. 2011 Aug 1;53(3):245–53.  
35
- 36 21. Panozzo CA, Becker-Dreps S, Pate V, Weber DJ, Jonsson Funk M, Stürmer T, et al. Direct, Indirect,  
37 Total, and Overall Effectiveness of the Rotavirus Vaccines for the Prevention of Gastroenteritis  
38 Hospitalizations in Privately Insured US Children, 2007–2010. *Am J Epidemiol*. 2014 Apr  
39 1;179(7):895–909.  
40
- 41 22. Lopman BA, Curns AT, Yen C, Parashar UD. Infant rotavirus vaccination may provide indirect  
42 protection to older children and adults in the United States. *J Infect Dis*. 2011 Oct 1;204(7):980–  
43 6.  
44
- 45 23. Gastañaduy PA, Curns AT, Parashar UD, Lopman BA. Gastroenteritis hospitalizations in older  
46 children and adults in the United States before and after implementation of infant rotavirus  
47 vaccination. *JAMA* 2013;310(8):851–3.  
48
- 49 24. Baker JM, Tate JE, Steiner CA, Haber MJ, Parashar UD, Lopman BA. Longer-term Direct and  
50 Indirect Effects of Infant Rotavirus Vaccination Across All Ages in the United States in 2000–2013:  
51 Analysis of a Large Hospital Discharge Data Set. *Clin Infect Dis*. 2019 Mar 3;68(6):976.  
52  
53  
54  
55  
56  
57  
58  
59  
60



- 1
  - 2
  - 3
  - 4
  - 5
  - 6
  - 7
  - 8
  - 9
  - 10
  - 11
  - 12
  - 13
  - 14
  - 15
  - 16
  - 17
  - 18
  - 19
  - 20
  - 21
  - 22
  - 23
  - 24
  - 25
  - 26
  - 27
  - 28
  - 29
  - 30
  - 31
  - 32
  - 33
  - 34
  - 35
  - 36
  - 37
  - 38
  - 39
  - 40
  - 41
  - 42
  - 43
  - 44
  - 45
  - 46
  - 47
  - 48
  - 49
  - 50
  - 51
  - 52
  - 53
  - 54
  - 55
  - 56
  - 57
  - 58
  - 59
  - 60
25. Anderson EJ, Shippee DB, Weinrobe MH, Davila MD, Katz BZ, Reddy S, et al. Indirect Protection of Adults From Rotavirus by Pediatric Rotavirus Vaccination. *Clinical Infectious Diseases* 2013;56(6):755–60.
26. Markkula J, Hemming-Harlo M, Salminen MT, Savolainen-Kopra C, Pirhonen J, al-Hello H, et al. Rotavirus epidemiology 5–6 years after universal rotavirus vaccination: persistent rotavirus activity in older children and elderly. *Infect Dis.* 2017 May 4;49(5):388–95.
27. Clark A, van Zandvoort K, Flasche S, Sanderson C, Bines J, Tate J, et al. Efficacy of live oral rotavirus vaccines by duration of follow-up: a meta-regression of randomised controlled trials. *Lancet Infect Dis.* 2019 Jul 1;19(7):717–27.
28. Baker JM, Tate JE, Leon J, Haber MJ, Pitzer VE, Lopman BA. Postvaccination Serum Antirotavirus Immunoglobulin A as a Correlate of Protection Against Rotavirus Gastroenteritis Across Settings. *J Infect Dis* 2020;222(2):309–18.

Confidential

**Table 1** Dates of Introduction for publicly funded rotavirus immunization programs in Canada by province with and without IMPACT sites.

| Province or Territory       | Month/Year     | Designated year 0 |
|-----------------------------|----------------|-------------------|
| <b>With IMPACT sites</b>    |                |                   |
| Ontario                     | August 2011    | 2011              |
| Québec                      | November 2011  | 2012              |
| British Columbia            | January 2012   | 2012              |
| Saskatchewan                | November 2012  | 2013              |
| Manitoba                    | April 2014     | 2014              |
| Alberta                     | June 2015      | 2015              |
| Newfoundland                | September 2015 | 2015              |
| Nova Scotia                 | November 2019  | 2020              |
| <b>Without IMPACT sites</b> |                |                   |
| Prince Edward Island        | December 2010  | NA                |
| New Brunswick               | May 2018       | NA                |
| Northwest Territories       | Fall 2013      | NA                |
| Nunavut                     | December 2017  | NA                |
| Yukon                       | October 2012   | NA                |

**Table 2** Demographics of cases in pre-vaccine versus post-vaccine time periods. \*

|                         | Pre-vaccine program period rotavirus disease |                           | Pre-vaccine program Period Total | Post-vaccine program period rotavirus disease |                         | Post-vaccine program Period Total | Overall Totals*    |
|-------------------------|----------------------------------------------|---------------------------|----------------------------------|-----------------------------------------------|-------------------------|-----------------------------------|--------------------|
|                         | Community acquired n= 3331                   | Hospital acquired n= 1109 |                                  | Community acquired n=656                      | Hospital acquired n=162 |                                   |                    |
| Age mean, median, (IQR) | 2.3, 1.5 (0.8-2.7)                           | 2.0, 0.8 (0.3-1.8)        | 2.2, 1.3 (0.6-2.5)               | 3.4, 2.4 (1.1-4.9)                            | 2.8, 1.0 (0.2-3.4)      | 3.0,1.8 (0.8-3.8)                 | 2.4, 1.4 (0.6-2.8) |
| 0-11 months n (%)       | 1118 (34)                                    | 648 (58)                  | 1766 (39.8%)                     | 161 (25)                                      | 79 (49)                 | 240 (29.3%)                       | 2006 (38.1%)       |
| 12-23 months n (%)      | 1027 (31)                                    | 209 (19)                  | 1236 (27.8%)                     | 129 (20)                                      | 26 (16)                 | 155 (19%)                         | 1391 (26.5%)       |
| 24-59 months n (%)      | 833 (25)                                     | 133 (12)                  | 966 (21.8%)                      | 207 (32)                                      | 27 (17)                 | 234 (28.6%)                       | 1200 (22.8%)       |
| 5-9 years n (%)         | 243 (7)                                      | 56 (5)                    | 299 (6.7%)                       | 126 (19)                                      | 15 (9)                  | 141 (17.2%)                       | 440 (8.4%)         |
| 10-16 years n (%)       | 110 (3)                                      | 63 (6)                    | 173 (3.9%)                       | 33 (5)                                        | 15 (9)                  | 48 (5.9%)                         | 221 (4.2%)         |

\* Excludes 433 cases from year of vaccine introduction (year 0) at all sites

**Table 3** Comparison of clinical features and outcome for **CA infections** in the pre-vaccine and post-vaccine era\*

|                                                        | Pre-vaccine period -1 to -13*               | Post-vaccine period +1 to +9               | P-value |
|--------------------------------------------------------|---------------------------------------------|--------------------------------------------|---------|
|                                                        | n = 1972<br>n, %, (95% confidence Interval) | n = 656<br>n, %, (95% confidence Interval) |         |
| Diarrhea, vomiting and fever                           | 1466<br>74 (72-76)                          | 408<br>62 (58-66)                          | <0.001  |
| Dehydration <sup>&amp;</sup>                           | 1594<br>81 (79-83)                          | 509<br>78 (74-81)                          | 0.07    |
| Electrolyte abnormalities                              | 920<br>47 (44-49)                           | 282<br>43 (39-47)                          | 0.10    |
| Shock <sup>&amp;</sup>                                 | 37<br>2 (1-3)                               | 20<br>3 (2-5)                              | 0.07    |
| Seizures <sup>&amp;</sup>                              | 145<br>7(6-9)                               | 54<br>8 (6-11)                             | 0.46    |
| IV hydration                                           | 1906<br>97 (96-97)                          | 624<br>95 (93-97)                          | 0.07    |
| Admitted to ICU admission<br>n, %<br>Median days (IQR) | 75, 3.8%<br>2 (1-4)                         | 38, 5.7%<br>1 (1-3)                        | 0.023   |
| Length of hospital stay, days (median, IQR)            | 2<br>(2-4)                                  | 3<br>(2-5)                                 | <0.001  |

\* Data from for this period available only from 2008 onward and excludes cases for from year of vaccine introduction (year 0) at all sites

<sup>&</sup> As noted in patient charts by admitting physician and criteria of low blood pressure and tachycardia for shock. Both febrile and afebrile seizures included.

**Table 4** Average hospitalization rates for CA and HA disease by age group in the pre-vaccine and post-vaccine time periods.

| Age Groups   | Average CA rotavirus admission rates<br>(per 10,000 hospital admissions) by<br>vaccine period |                        |
|--------------|-----------------------------------------------------------------------------------------------|------------------------|
|              | Pre vaccine period                                                                            | Post vaccine<br>period |
| 0-11 months  | 18.3                                                                                          | 0*                     |
| 12-23 months | 18.2                                                                                          | 0*                     |
| 24-59 months | 15.4                                                                                          | 1.4                    |
| 5-9 years    | 6.1                                                                                           | 1.6                    |
| 10-16 years  | 2.3                                                                                           | 0.5                    |
|              | Average HA Rotavirus hospitalizations (per<br>1000 patient days) by vaccine period            |                        |
|              | Pre vaccine period                                                                            | Post vaccine<br>period |
| 0-11 months  | 0.19                                                                                          | 0*                     |
| 12-23 months | 0.07                                                                                          | 0*                     |
| 24-59 months | 0.05                                                                                          | 0.003                  |
| 5-9 years    | 0.02                                                                                          | 0.003                  |
| 10-16 years  | 0.01                                                                                          | 0.005                  |

\*Postvaccine period presents the indirect effect as it excludes patients who were or are in a vaccine eligible cohort.

Figure 1

a) Yearly CA rotavirus admissions per 10,000 hospital admissions from 2005 to 2020 by timing of vaccine program initiation. \* The overall average rate of hospitalization due to CA rotavirus decreased from 60.3 [95% CI 52.0-68.6] per 10,000 admissions in the pre vaccine period to 10.98 [95% CI 6.2-15.82] per 10,000 admissions resulting in a rate reduction of 82% [95% CI 74.4%-89.8%]

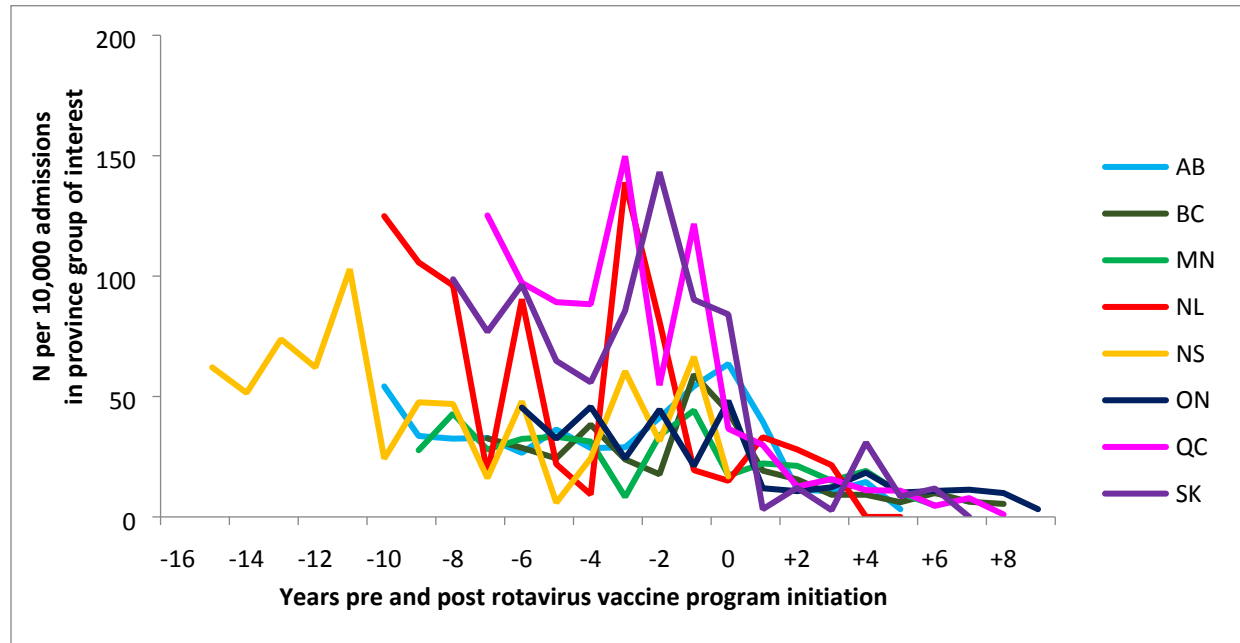

b) Yearly HA rotavirus admissions per 1,000 patient days from 2005 to 2020 by timing of vaccine program initiation. \* The prevalence of HA rotavirus decreased by 85% [95% CI 27.6%-99.7%]; 0.35 per 1000 patient days during the pre vaccine period to 0.05 per 1000 patient days in the post vaccine period.

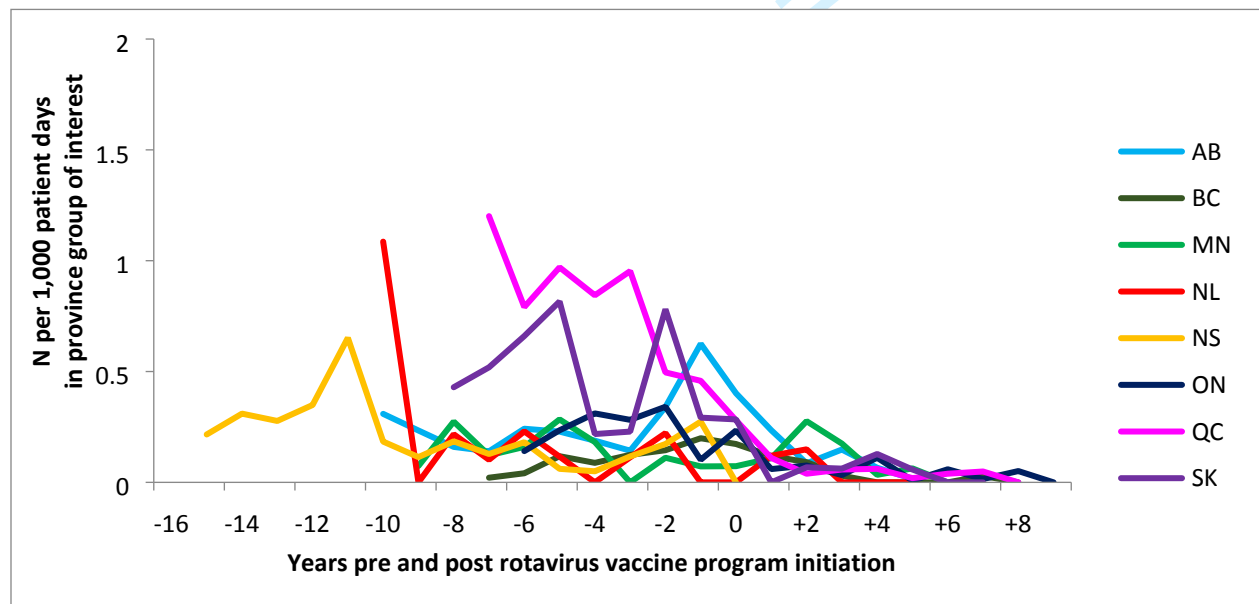



Figure 2

- a) The yearly CA rotavirus admissions per 10,000 hospital admissions **by age** pre and post vaccine periods with year 0 as the year of program start in provinces.\*

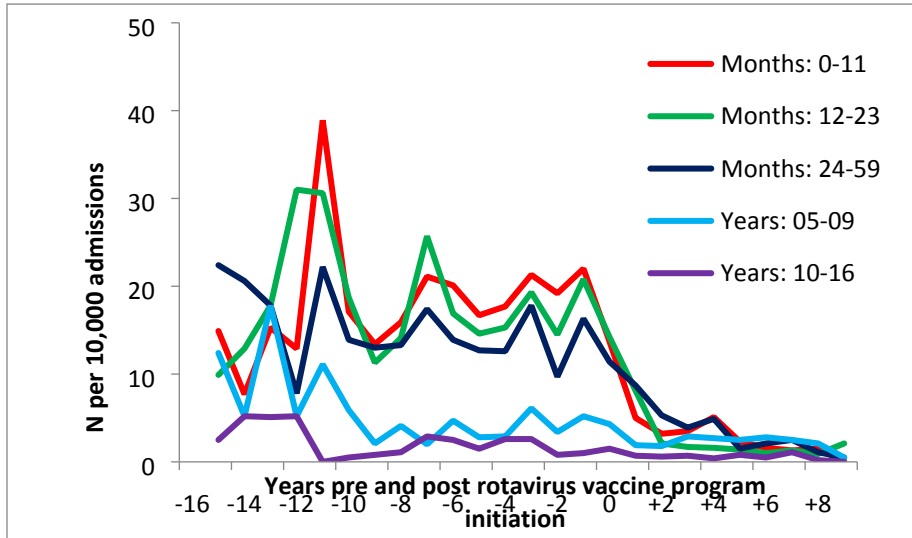

- b) The yearly rates of HA rotavirus per 1000 patient days **by age** 2005 to 2020 and pre and post vaccine time periods.

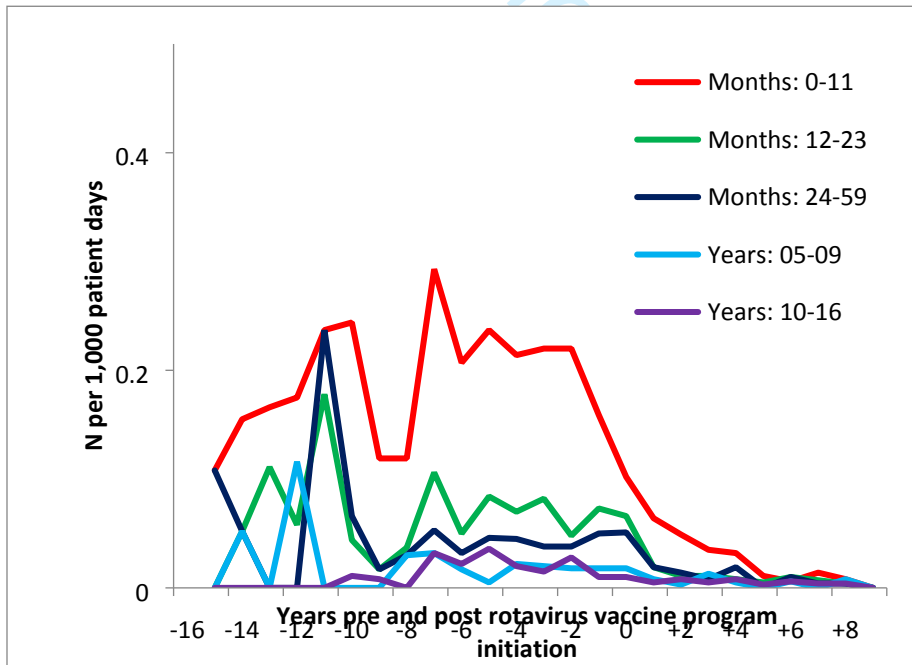

\* Years -15 to -1 represent the pre vaccine periods while years 1 to 9 indicate the post vaccine period with year 0 representing the year of program implementation.
